# Supplementary material for: The Adsorption of 2,4-Dichlorobenzoic Acid on Carbon Nanofibers Produced by Catalytic Pyrolysis of Trichloroethylene and Acetonitrile
Source: MDPI journal article supplement (doi:10.3390/c9040098), 2023-10-11
Supplement: s1 [file s1]

## Supplementary Materials

### The effect of pH on the adsorption of 2,4-dichlorobenzoic acid on carbon nanofibers produced via catalytic pyrolysis of tri-chloroethylene

Anna M. Ozerova <sup>1</sup>, Elena S. Tayban <sup>1</sup>, Inna L. Lipatnikova <sup>1</sup>, Arina R. Potylitsyna <sup>1,2</sup>, Yury I. Bauman <sup>1</sup>, Igor P. Prosvirin <sup>1</sup>, Yury V. Shubin <sup>3</sup>, Aleksey A. Vedyagin <sup>1</sup>, Ilya V. Mishakov <sup>1,\*</sup> and Olga V. Netskina <sup>1,2,\*</sup>

<sup>1</sup> Boreskov Institute of Catalysis SB RAS, Lavrentieva Av. 5, 630090 Novosibirsk, Russia

<sup>2</sup> Department of Natural Sciences, Novosibirsk State University, Pirogova Str. 2, 630090 Novosibirsk, Russia

<sup>3</sup> Nikolaev Institute of Inorganic Chemistry SB RAS, Lavrentieva Av. 3, 630090 Novosibirsk, Russia

\* Correspondence: mishakov@catalysis.ru (I.V.M.); netskina@catalysis.ru (O.V.N.); Tel.: +7-383-330-7458 (O.V.N.); +7-383-326-9780 (I.V.M.)

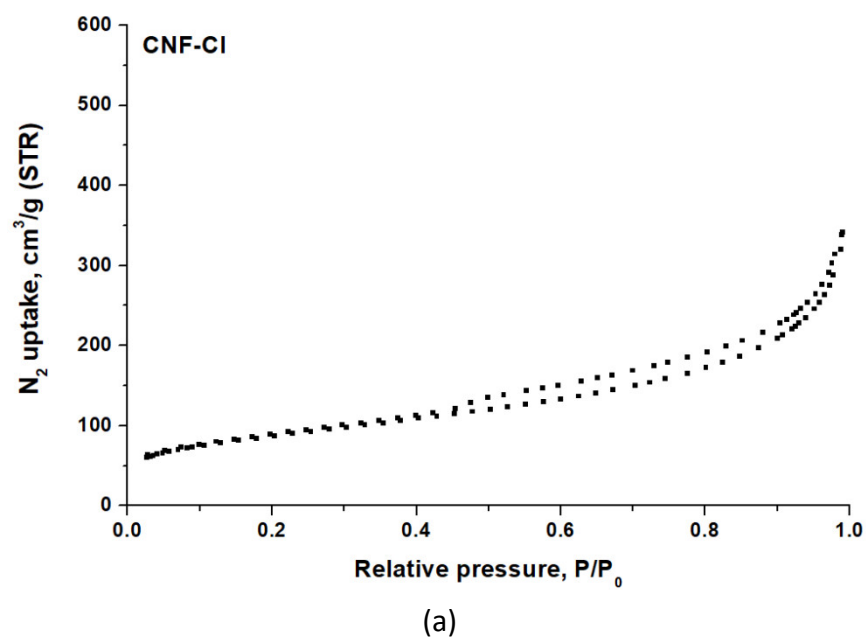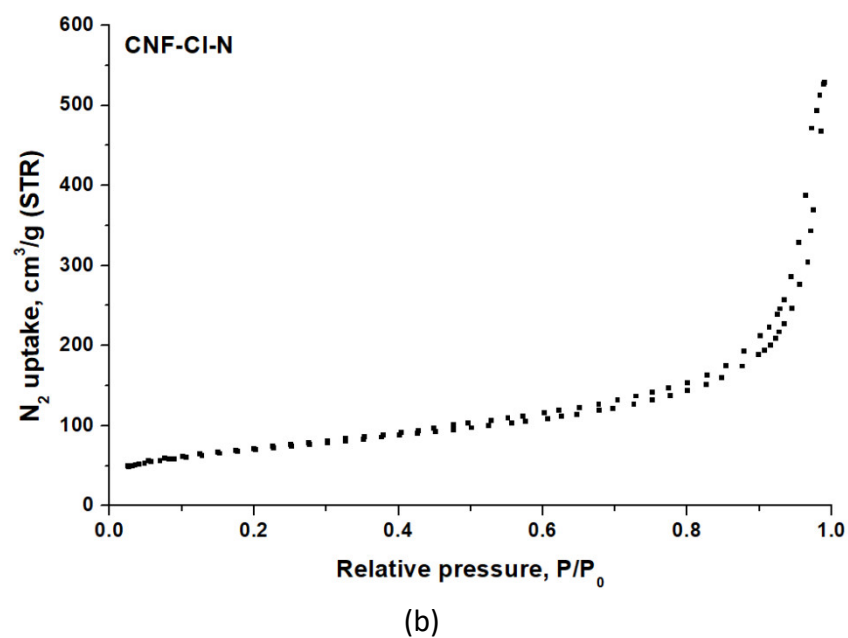

**Figure S1.** Nitrogen adsorption isotherm (77.4 K) for (a) CNF-Cl and (b) CNF-Cl-N.

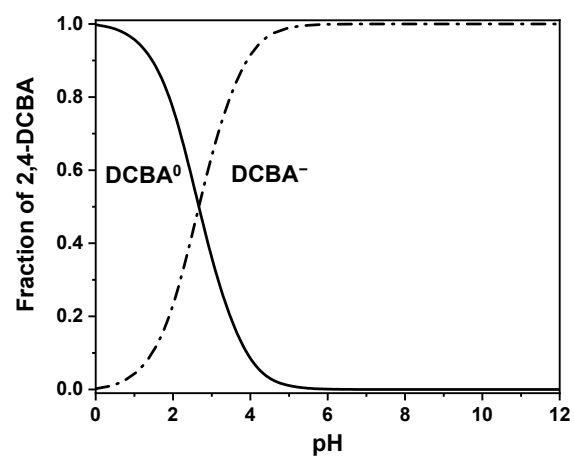

**Figure S2.** Species distribution of 2,4-DCBA as a function of solution pH.

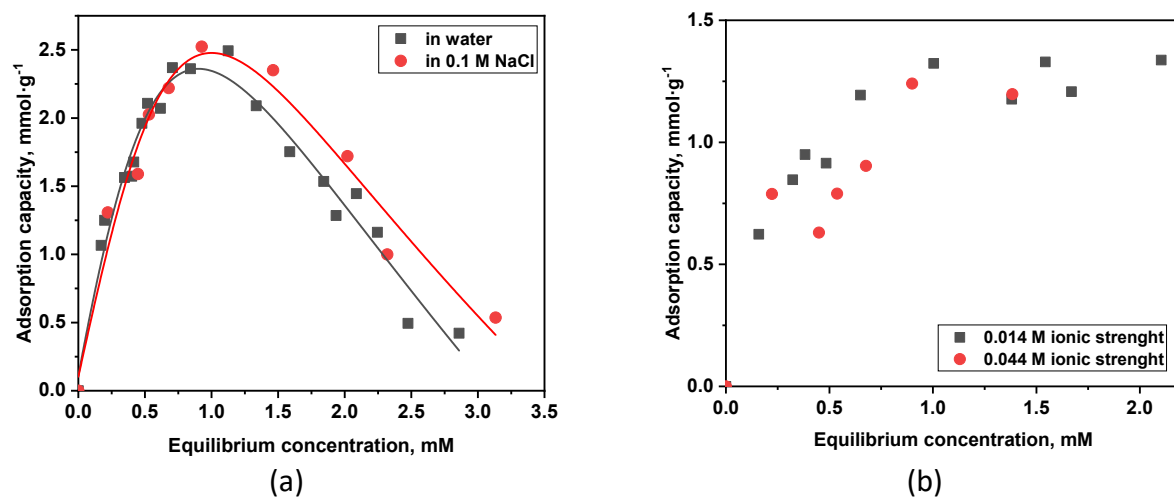

**Figure S3.** The influence of ionic strength on the adsorption of 2,4-DCBA on the carbon material. (a) Experimental adsorption isotherms of 2,4-DCBA obtained in water and 0.1 M NaCl solution at a natural pH. (b) Experimental adsorption isotherms of 2,4-DCBA at pH = 2 and different ionic strengths. Ionic strengths of 0.014 M and 0.044 M were obtained by using HCl with concentrations of 0.1 M and 2.45 M for adjusting the pH to 2.

**Table S1.** Values of parameters calculated from the Langmuir, Freundlich, and Dubinin–Astakhov adsorption isotherms for 2,4-DCBA on the CNF-Cl sample at different pHs.

| Isotherm                | Parameter                                            | Value     |           |           |           |           |
|-------------------------|------------------------------------------------------|-----------|-----------|-----------|-----------|-----------|
|                         |                                                      | pH=2      | pH=3      | pH=4      | pH=5      | pH=9      |
| Langmuir                | $A_{\max}$ , mol·g <sup>-1</sup>                     | 0.0024    | 0.0016    | 0.0014    | 0.0010    | 0.00022   |
|                         | $K_L$ , L·mol <sup>-1</sup>                          | 2403      | 2901      | 1520      | 6409      | 13839     |
|                         | $R^2$                                                | 0.984     | 0.934     | 0.977     | 0.943     | 0.990     |
| Freundlich              | $K_F$ , mol·g <sup>-1</sup>                          | 0.0016    | 0.0011    | 0.0008    | 0.0008    | 0.0002    |
|                         | 1/n                                                  | 0.35±0.01 | 0.31±0.03 | 0.42±0.02 | 0.19±0.03 | 0.11±0.02 |
|                         | $R^2$                                                | 0.999     | 0.959     | 0.983     | 0.968     | 0.992     |
| Dubinin–Astakhov<br>n=1 | $A_{\max}$ , mol·g <sup>-1</sup>                     | 0.0021    | 0.0015    | 0.0012    | 0.0010    | 0.00021   |
|                         | $V_{\max}$ , cm <sup>3</sup> ·g <sup>-1</sup>        | 0.26      | 0.19      | 0.18      | 0.12      | 0.026     |
|                         | $E_{\text{ads}}^{\text{eff}}$ , kJ·mol <sup>-1</sup> | 7.01      | 8.0       | 5.9       | 12.8      | 22.3      |
|                         | $R^2$                                                | 0.999     | 0.959     | 0.983     | 0.968     | 0.992     |
| Dubinin–Astakhov<br>n=2 | $A_{\max}$ , mol·g <sup>-1</sup>                     | 0.0019    | 0.0014    | 0.0010    | 0.00094   | 0.00021   |
|                         | $V_{\max}$ , cm <sup>3</sup> ·g <sup>-1</sup>        | 0.24      | 0.17      | 0.12      | 0.118     | 0.026     |
|                         | $E_{\text{ads}}^{\text{eff}}$ , kJ·mol <sup>-1</sup> | 6.23      | 6.9       | 5.53      | 9.0       | 11.1      |
|                         | $R^2$                                                | 0.968     | 0.918     | 0.957     | 0.943     | 0.990     |
| Dubinin–Astakhov<br>n=3 | $A_{\max}$ , mol·g <sup>-1</sup>                     | 0.0018    | 0.0013    | 0.0010    | 0.00091   | 0.0002    |
|                         | $V_{\max}$ , cm <sup>3</sup> ·g <sup>-1</sup>        | 0.23      | 0.16      | 0.12      | 0.11      | 0.025     |
|                         | $E_{\text{ads}}^{\text{eff}}$ , kJ·mol <sup>-1</sup> | 6.14      | 6.58      | 5.4       | 8.11      | 8.9       |
|                         | $R^2$                                                | 0.916     | 0.876     | 0.906     | 0.913     | 0.985     |

**Table S2.** Values of parameters calculated from the Langmuir, Freundlich, and Dubinin–Astakhov adsorption isotherms for 2,4-DCBA on the CNF-Cl-N sample at different pHs.

| Isotherm                  | Parameter                                                           | Value           |                 |                 |                 |                 |
|---------------------------|---------------------------------------------------------------------|-----------------|-----------------|-----------------|-----------------|-----------------|
|                           |                                                                     | pH=2            | pH=3            | pH=4            | pH=5            | pH=9            |
| Langmuir                  | $A_{\max} \cdot \text{mol} \cdot \text{g}^{-1}$                     | 0.0018          | 0.0010          | 0.00098         | 0.0008          | 0.00016         |
|                           | $K_L \cdot \text{L} \cdot \text{mol}^{-1}$                          | 1265            | 7570            | 3413            | 2205            | 10330           |
|                           | $R^2$                                                               | 0.960           | 0.965           | 0.971           | 0.929           | 0.954           |
| Freundlich                | $K_F \cdot \text{mol} \cdot \text{g}^{-1}$                          | 0.00095         | 0.00087         | 0.00074         | 0.0005          | 0.00014         |
|                           | $1/n$                                                               | $0.49 \pm 0.00$ | $0.19 \pm 0.03$ | $0.32 \pm 0.03$ | $0.39 \pm 0.04$ | $0.12 \pm 0.03$ |
|                           | $R^2$                                                               | 0.988           | 0.981           | 0.977           | 0.947           | 0.943           |
| Dubinin–Astakhov<br>$n=1$ | $A_{\max} \cdot \text{mol} \cdot \text{g}^{-1}$                     | 0.0013          | 0.00099         | 0.00088         | 0.00066         | 0.00016         |
|                           | $V_{\max} \cdot \text{cm}^3 \cdot \text{g}^{-1}$                    | 0.16            | 0.12            | 0.11            | 0.084           | 0.02            |
|                           | $E_{\text{ads}}^{\text{eff}} \cdot \text{kJ} \cdot \text{mol}^{-1}$ | 5.0             | 12.58           | 7.73            | 6.34            | 20.0            |
|                           | $R^2$                                                               | 0.988           | 0.981           | 0.977           | 0.947           | 0.956           |
| Dubinin–Astakhov<br>$n=2$ | $A_{\max} \cdot \text{mol} \cdot \text{g}^{-1}$                     | 0.0011          | 0.0009          | 0.0008          | 0.00059         | 0.00015         |
|                           | $V_{\max} \cdot \text{cm}^3 \cdot \text{g}^{-1}$                    | 0.14            | 0.11            | 0.10            | 0.07            | 0.019           |
|                           | $E_{\text{ads}}^{\text{eff}} \cdot \text{kJ} \cdot \text{mol}^{-1}$ | 5.02            | 8.7             | 6.34            | 5.8             | 10.4            |
|                           | $R^2$                                                               | 0.902           | 0.961           | 0.958           | 0.905           | 0.952           |
| Dubinin–Astakhov<br>$n=3$ | $A_{\max} \cdot \text{mol} \cdot \text{g}^{-1}$                     | 0.0010          | 0.00088         | 0.00075         | 0.00056         | 0.00015         |
|                           | $V_{\max} \cdot \text{cm}^3 \cdot \text{g}^{-1}$                    | 0.125           | 0.11            | 0.094           | 0.07            | 0.019           |
|                           | $E_{\text{ads}}^{\text{eff}} \cdot \text{kJ} \cdot \text{mol}^{-1}$ | 5.19            | 7.9             | 6.12            | 5.7             | 8.4             |
|                           | $R^2$                                                               | 0.820           | 0.942           | 0.920           | 0.840           | 0.956           |

**Table S3.** Comparison of maximum adsorption capacities of various adsorbents for 2,4-DCBA.

| Adsorbent   | Concentration range of 2,4-DCBA, mM | Sorbent dosage, mg/mL | Contact time, hr | pH            | Maximum adsorption capacity, mmol/g | Reference |
|-------------|-------------------------------------|-----------------------|------------------|---------------|-------------------------------------|-----------|
| Pd/CB       | 0-0.275                             | 0.4                   | 3                | 4             | 0.26                                | [1]       |
| Pd/MWCNTs   |                                     |                       |                  |               | 0.16                                |           |
| Pd/GAC      |                                     |                       |                  |               | 0.05                                |           |
| CTAB-Pd/GAC | 0-0.0156                            | 1                     | 3                | not mentioned | 0.013                               | [2]       |
| CNF-Cl      | 0-2.5                               | 0.05                  | 24               | natural       | 2.32                                | This work |
| CNF-Cl-N    |                                     |                       |                  |               | 2.29                                |           |

CB: carbon black; MWCNTs: multi-walled carbon nanotubes; GAC: granular activated carbon; CTAB-Pd/GAC: functionalized palladium/granular activated carbon with cetyltrimethylammonium bromide.

1. Zhou, J.; Lou, Z.; Yang, K.; Xu, J.; Li, Y.; Liu, Y.; Baig, S.A.; Xu, X. Electrocatalytic Dechlorination of 2,4-Dichlorobenzoic Acid Using Different Carbon-Supported Palladium Moveable Catalysts: Adsorption and Dechlorination Activity. *Appl. Catal. B Environ.* **2019**, *244*, 215–224, doi:10.1016/j.apcatb.2018.11.052.
2. Zhou, J.; Lou, Z.; Wang, Z.; Zhou, C.; Li, C.; Ali Baig, S.; Xu, X. Electrocatalytic Dechlorination of 2,4-DCBA Using CTAB Functionalized Pd/GAC Movable Granular Catalyst: Role of Adsorption in Catalysis. *Chem. Eng. J.* **2021**, *414*, 128758, doi:10.1016/j.cej.2021.128758.
